# Supplementary material for: Marine Microorganism-Derived Macrolactins Inhibit Inflammatory Mediator Effects in LPS-Induced Macrophage and Microglial Cells by Regulating BACH1 and HO-1/Nrf2 Signals through Inhibition of TLR4 Activation
Source: PubMed Central journal article supplement (PMC7037854; doi:10.3390/molecules25030656), 2020-02-04
Supplement: molecules-25-00656-s001.pdf [file molecules-25-00656-s001.pdf]

1 *Supplementary Materials*

2 **Marine microorganism-derived macrolactins inhibit**  
3 **inflammatory mediator effects in LPS-induced**  
4 **macrophage and microglial cells by regulating**  
5 **BACH1 and HO-1/Nrf2 signals through inhibition of**  
6 **TLR4 activation**

7

8 Eun-Nam Kim<sup>1‡</sup>, Ming Gao<sup>2‡</sup>, Hyukjae Choi<sup>2\*</sup> and Gil-Saeng Jeong<sup>1\*</sup>

9

10 <sup>1</sup>College of Pharmacy, Keimyung University, 1095 Dalgubeol-daero, Daegu 42601, Republic of Korea;  
11 enkimpharm@gmail.com (E-N. K.); gsjeong@kmu.ac.kr (G-S. K.)

12 <sup>2</sup>College of Pharmacy, Yeungnam University, 280 Daehak-ro, Gyeongsan 38541, Republic of Korea;  
13 gaoming104@hotmail.com (M. G.); h5choi@yu.ac.kr (H. C.)

14 \*Correspondence to: Prof. Gil-Saeng Jeong and Prof. Hyukjae Choi

15 ‡These two authors contributed equally to this work.

16

17 **List of Figures**

**Figure S1:** <sup>1</sup>H NMR (250 MHz, CDCl<sub>3</sub>) spectrum of macrolactin A (1)

**Figure S2:** <sup>13</sup>C NMR (62.5 MHz, CDCl<sub>3</sub>) spectrum of macrolactin A (1)

**Figure S3:** <sup>1</sup>H-<sup>1</sup>H COSY (250 MHz, CDCl<sub>3</sub>) spectrum of macrolactin A (1)

**Figure S4:** HMQC (250 MHz, CDCl<sub>3</sub>) spectrum of macrolactin A (1)

**Figure S5:** HMBC (250 MHz, CDCl<sub>3</sub>) spectrum of macrolactin A (1)

**Figure S6:** <sup>1</sup>H NMR (500 MHz, CDCl<sub>3</sub>) spectrum of 15-*epi*-dihydromacrolactin F (2)

**Figure S7:** <sup>13</sup>C NMR (125 MHz, CDCl<sub>3</sub>) spectrum of 15-*epi*-dihydromacrolactin F (2)

**Figure S8:** <sup>1</sup>H-<sup>1</sup>H COSY (500 MHz, CDCl<sub>3</sub>) spectrum of 15-*epi*-dihydromacrolactin F (2)

**Figure S9 :** HMQC (500 MHz, CDCl<sub>3</sub>) spectrum of 15-*epi*-dihydromacrolactin F (2)

**Figure S10 :** HMBC (500 MHz, CDCl<sub>3</sub>) spectrum of 15-*epi*-dihydromacrolactin F (2)

**Figure S11:** HR- FAB-MS of 15-*epi*-dihydromacrolactin F (2)

**Figure S12:** <sup>1</sup>H NMR (500 MHz, CDCl<sub>3</sub>) spectrum of *tris*-(*S*)-MTPA ester of **2** (2a)

**Figure S13:** <sup>1</sup>H-<sup>1</sup>H COSY (500 MHz, CDCl<sub>3</sub>) spectrum of *tris*-(*S*)-MTPA ester of **2** (2a)

**Figure S14:** <sup>1</sup>H NMR (500 MHz, CDCl<sub>3</sub>) spectrum of *tris*-(*R*)-MTPA ester of **2** (2b)

**Figure S15:** <sup>1</sup>H-<sup>1</sup>H COSY (500 MHz, CDCl<sub>3</sub>) spectrum of *tris*-(*R*)-MTPA ester of **2** (2b)

**Figure S16:** <sup>1</sup>H NMR (500 MHz, CD<sub>3</sub>OD) spectrum of macrolactin F (3)

**Figure S17:** <sup>13</sup>C NMR (125 MHz, CD<sub>3</sub>OD) spectrum of macrolactin F (3)

**Figure S18:** <sup>1</sup>H-<sup>1</sup>H COSY (500 MHz, CD<sub>3</sub>OD) spectrum of macrolactin F (3)

**Figure S19:** HMQC (500 MHz, CD<sub>3</sub>OD) spectrum of macrolactin F (3)

**Figure S20:** HMBC (500 MHz, CD<sub>3</sub>OD) spectrum of macrolactin F (3)

18

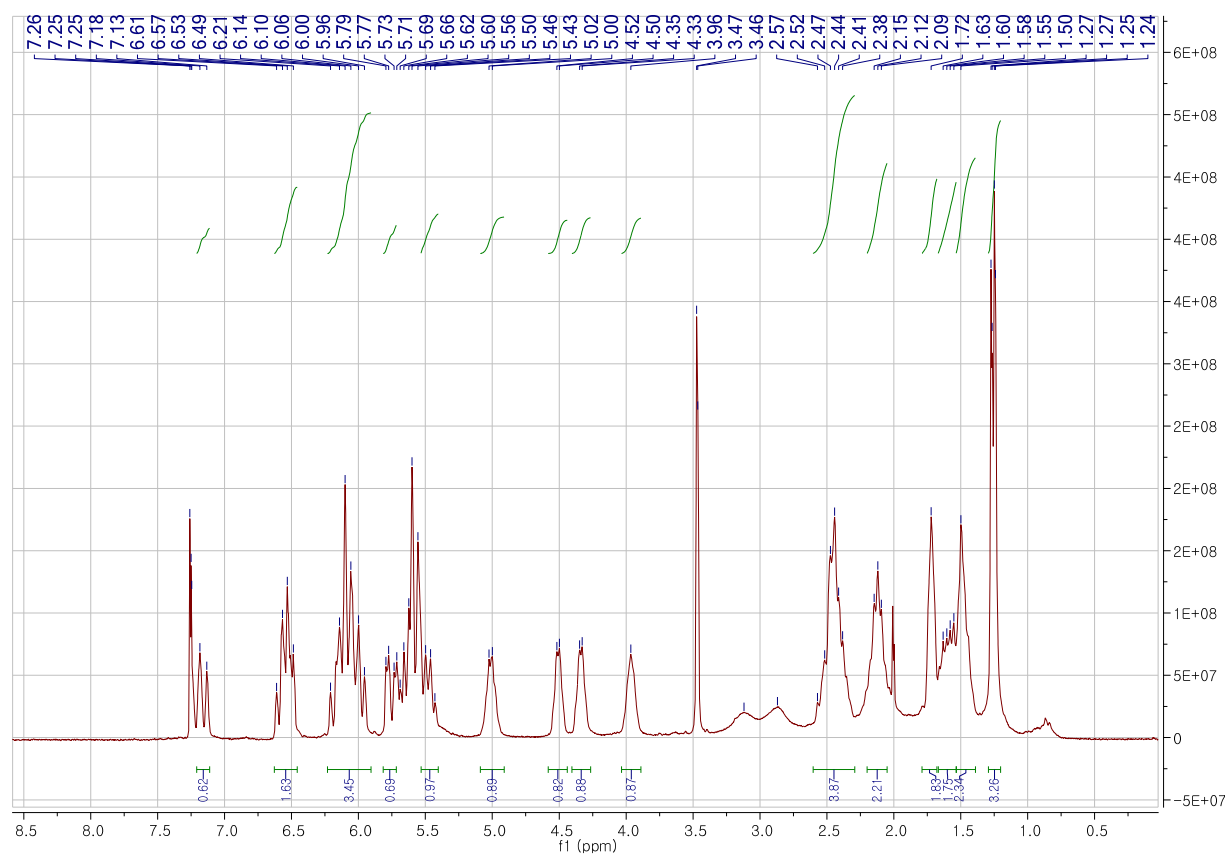

19

20 **Figure S1.**  $^1\text{H}$  NMR (250 MHz,  $\text{CDCl}_3$ ) spectrum of macrolactin A (1)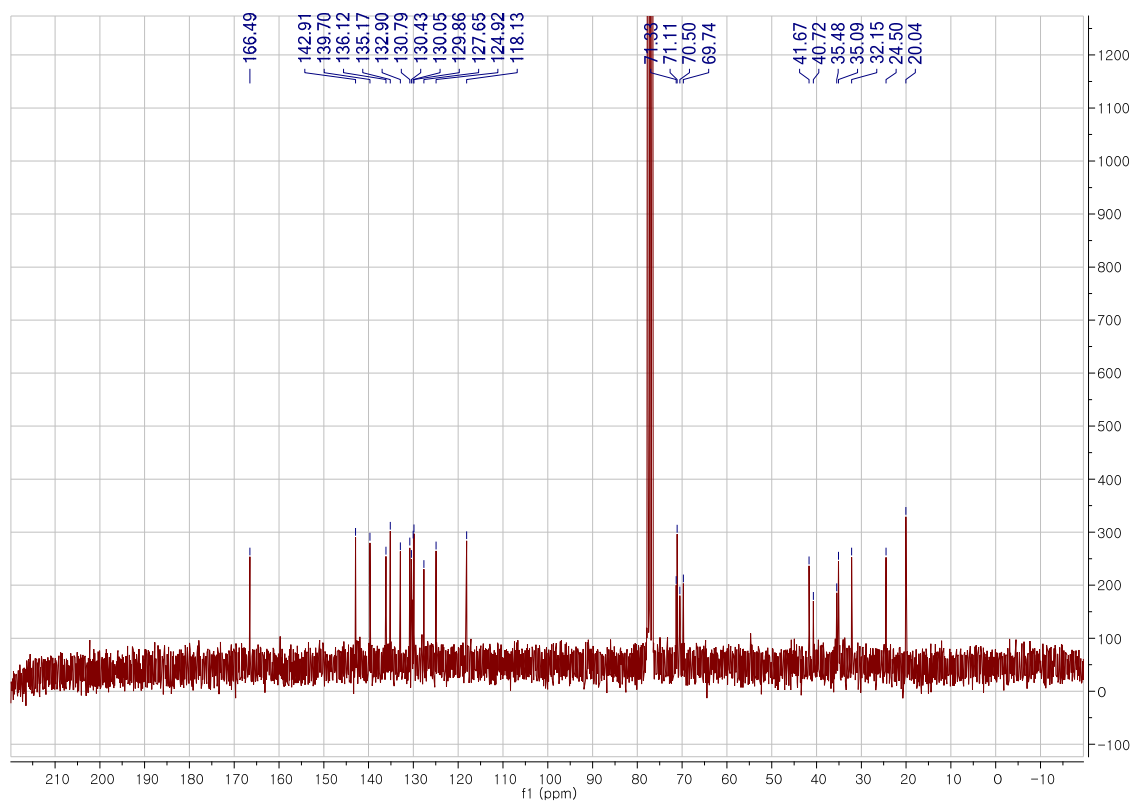

21

22 **Figure S2.**  $^{13}\text{C}$  NMR (62.5 MHz,  $\text{CDCl}_3$ ) spectrum of macrolactin A (1)

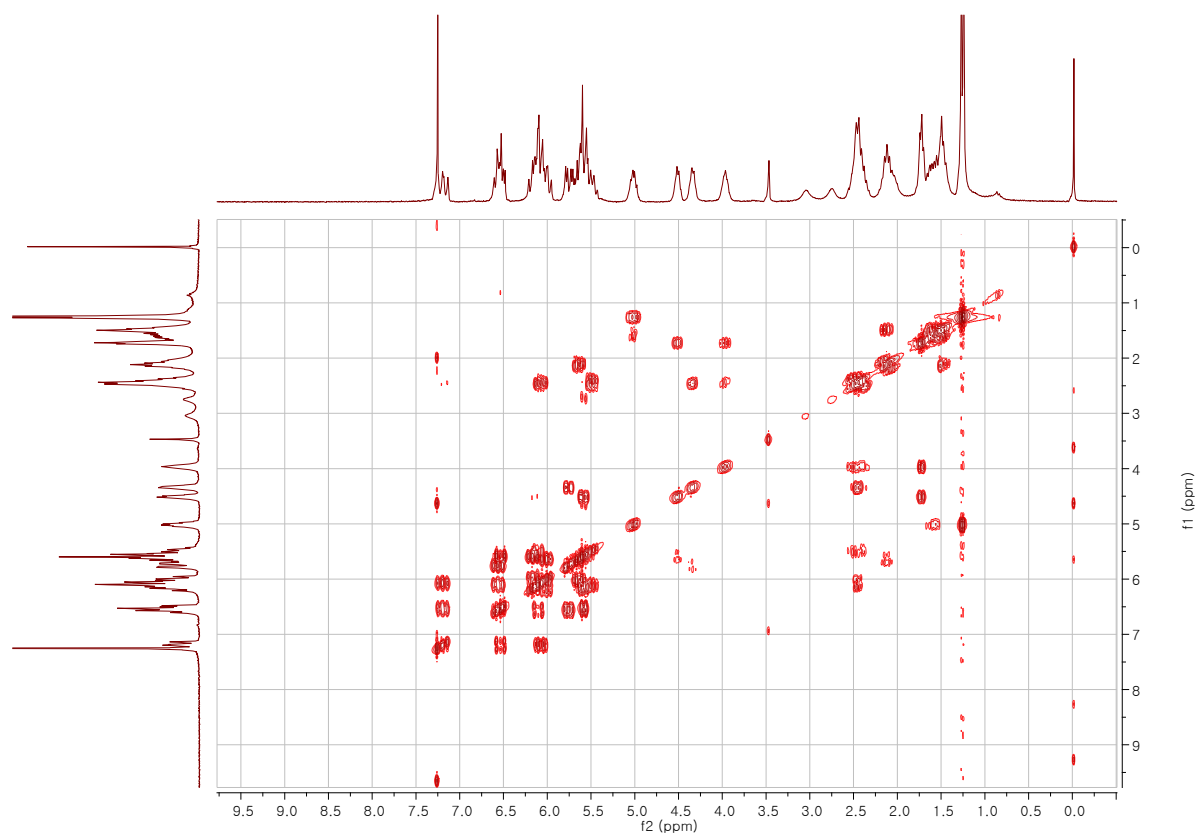

23

24 **Figure S3.**  $^1\text{H}$ - $^1\text{H}$  COSY (250 MHz,  $\text{CDCl}_3$ ) spectrum of macrolactin A (**1**)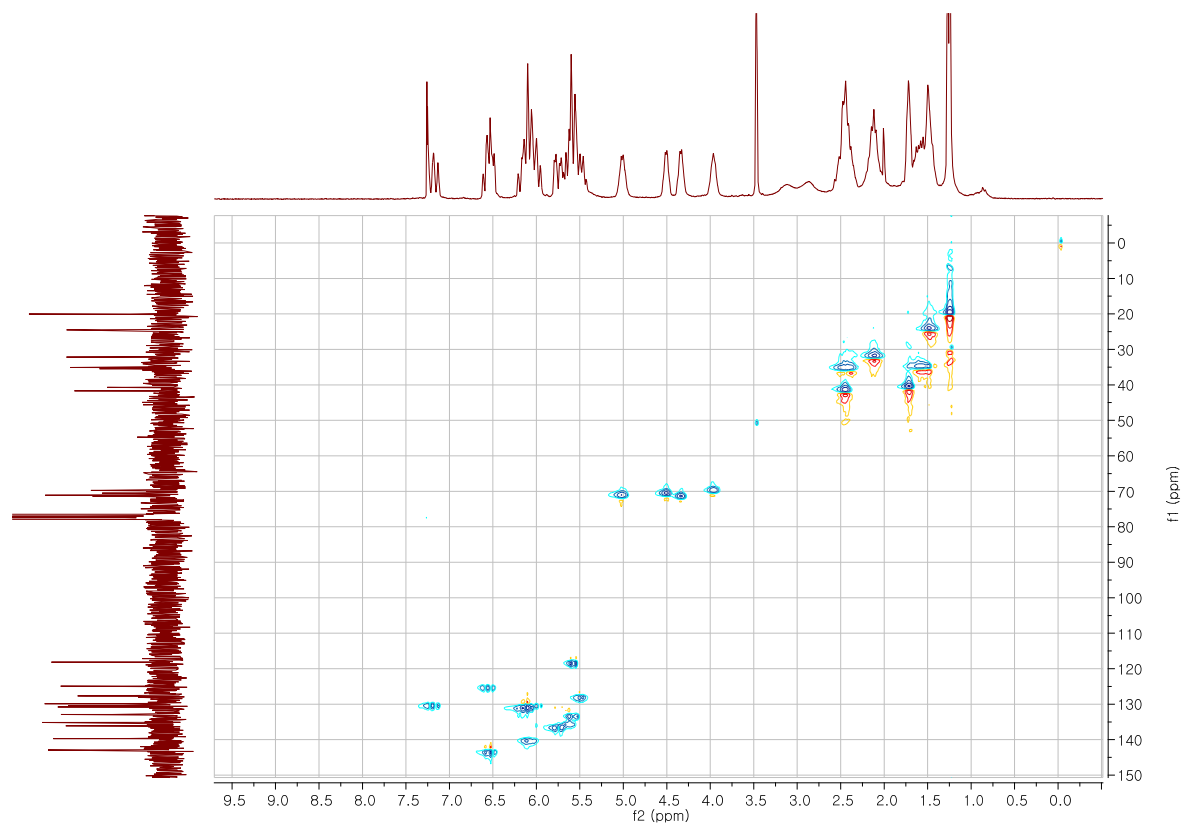

25

26 **Figure S4.** HMQC (250 MHz,  $\text{CDCl}_3$ ) spectrum of macrolactin A (**1**)

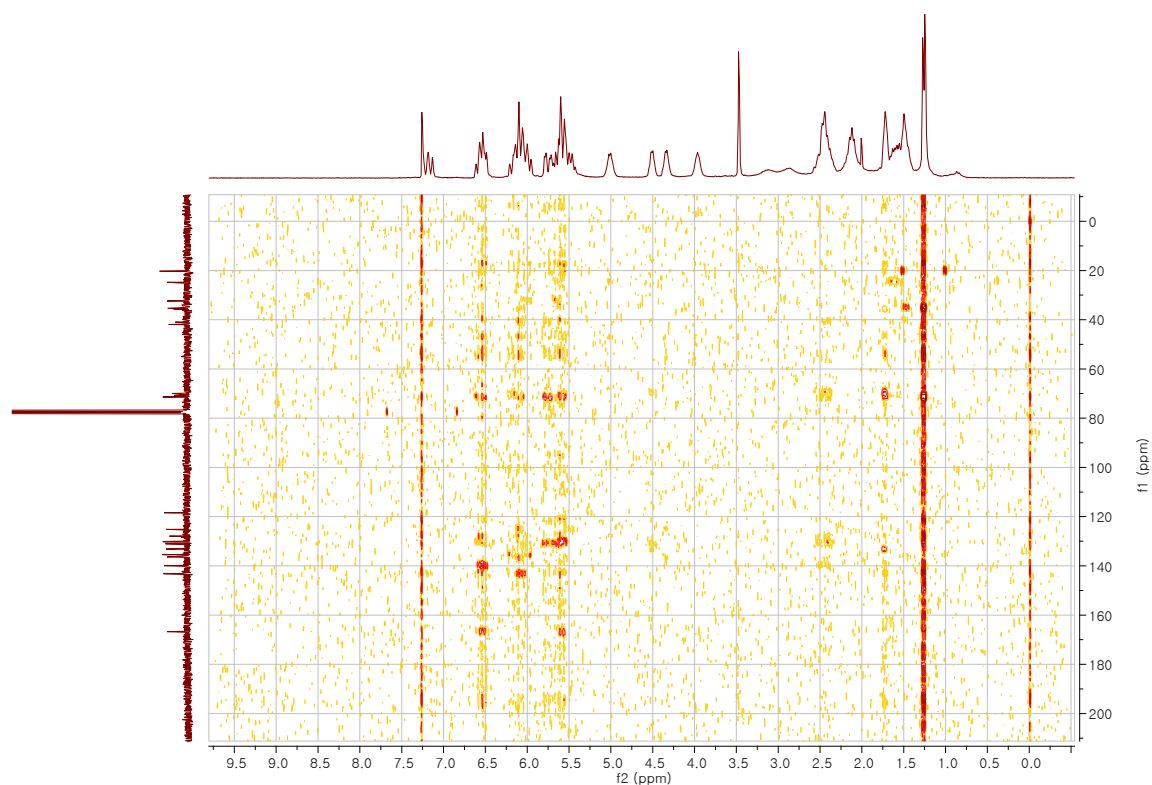

27

28 **Figure S5.** HMBC (250 MHz, CDCl<sub>3</sub>) spectrum of macrolactin A (**1**)

29

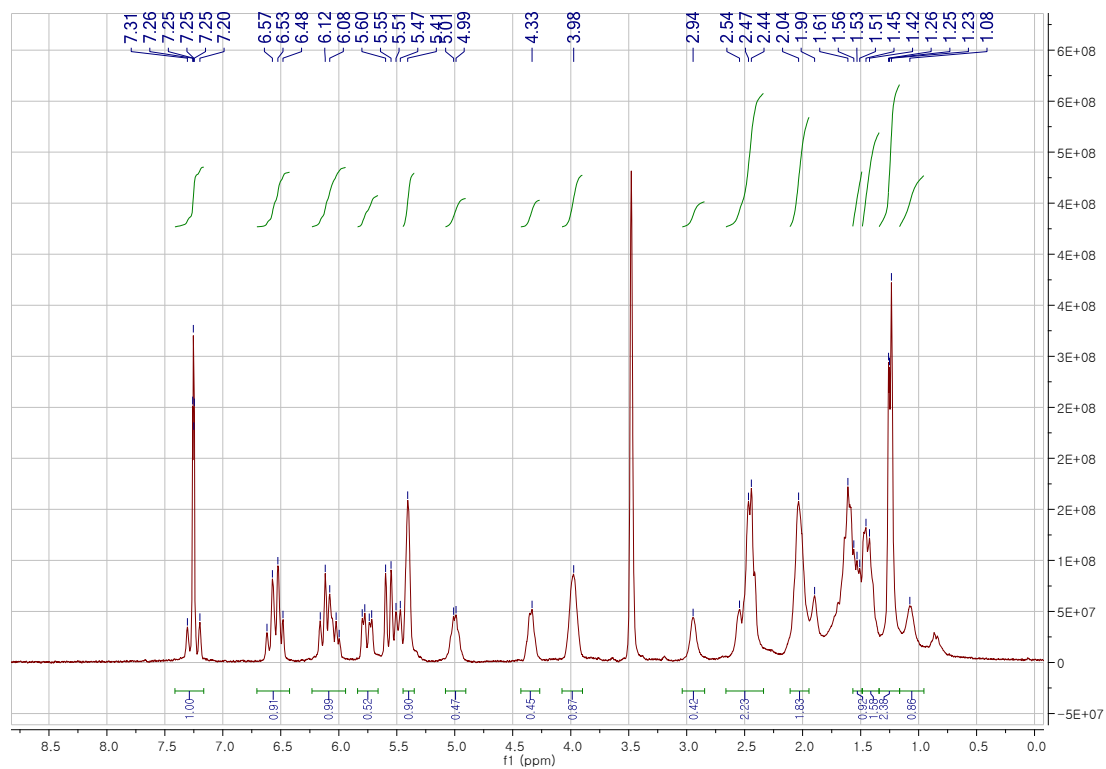

30

31 **Figure S16.** <sup>1</sup>H NMR (500 MHz, CDCl<sub>3</sub>) spectrum of 15-*epi*-dihydromacrolactin F (**2**)

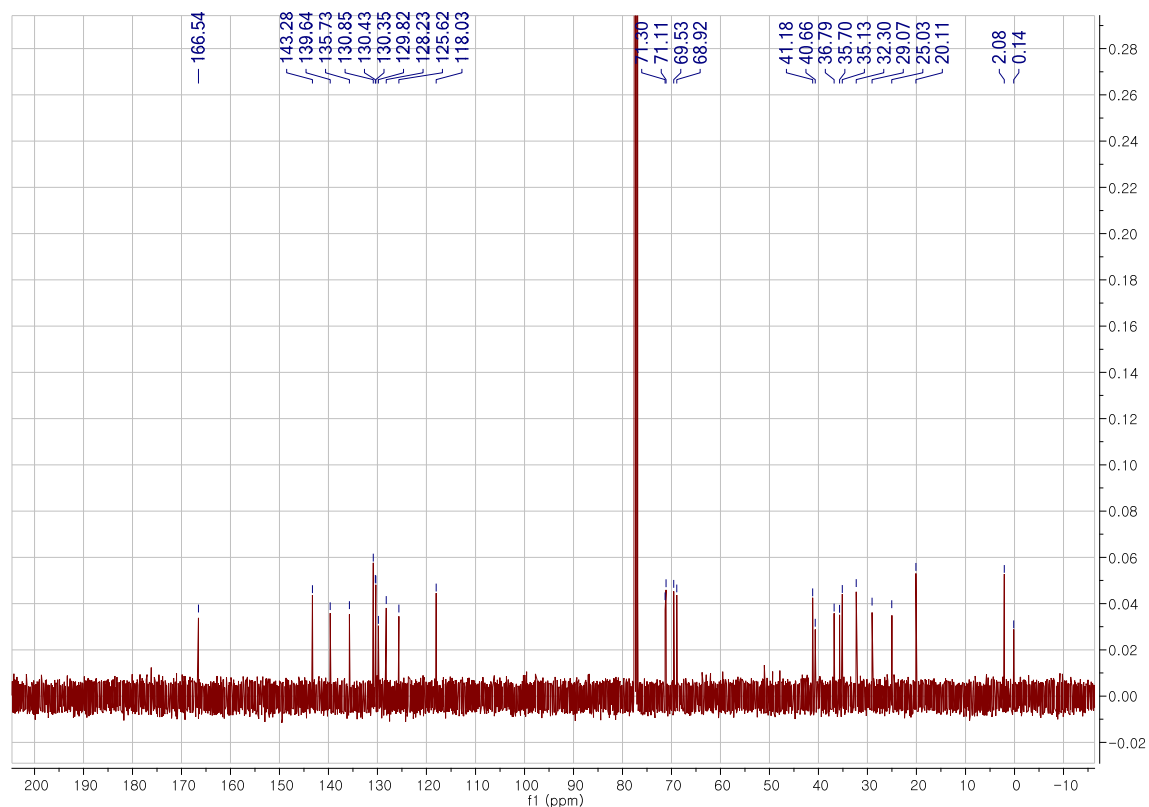

32

33 **Figure S7.**  $^{13}\text{C}$  NMR (125 MHz,  $\text{CDCl}_3$ ) spectrum of 15-*epi*-dihydromacrolactin F (2)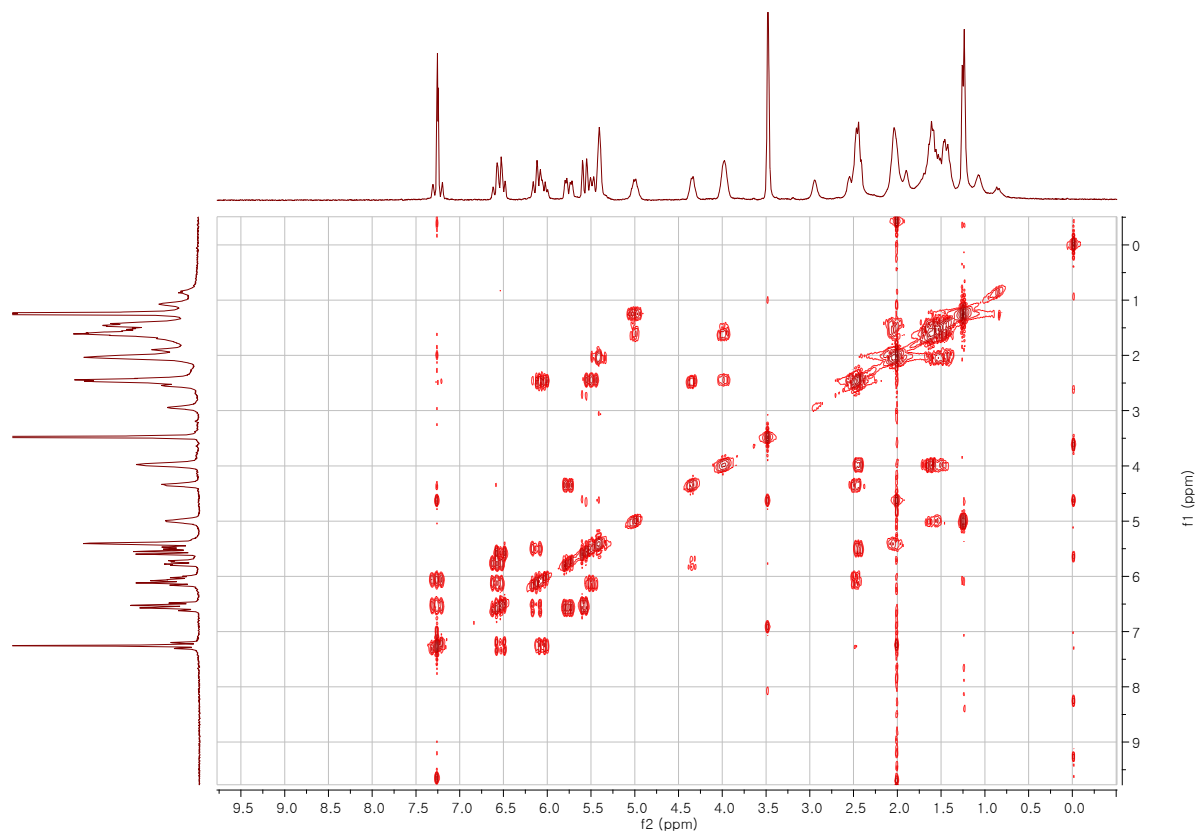

34

35 **Figure S8.**  $^1\text{H}$ - $^1\text{H}$  COSY (500 MHz,  $\text{CDCl}_3$ ) spectrum of 15-*epi*-dihydromacrolactin F (2)

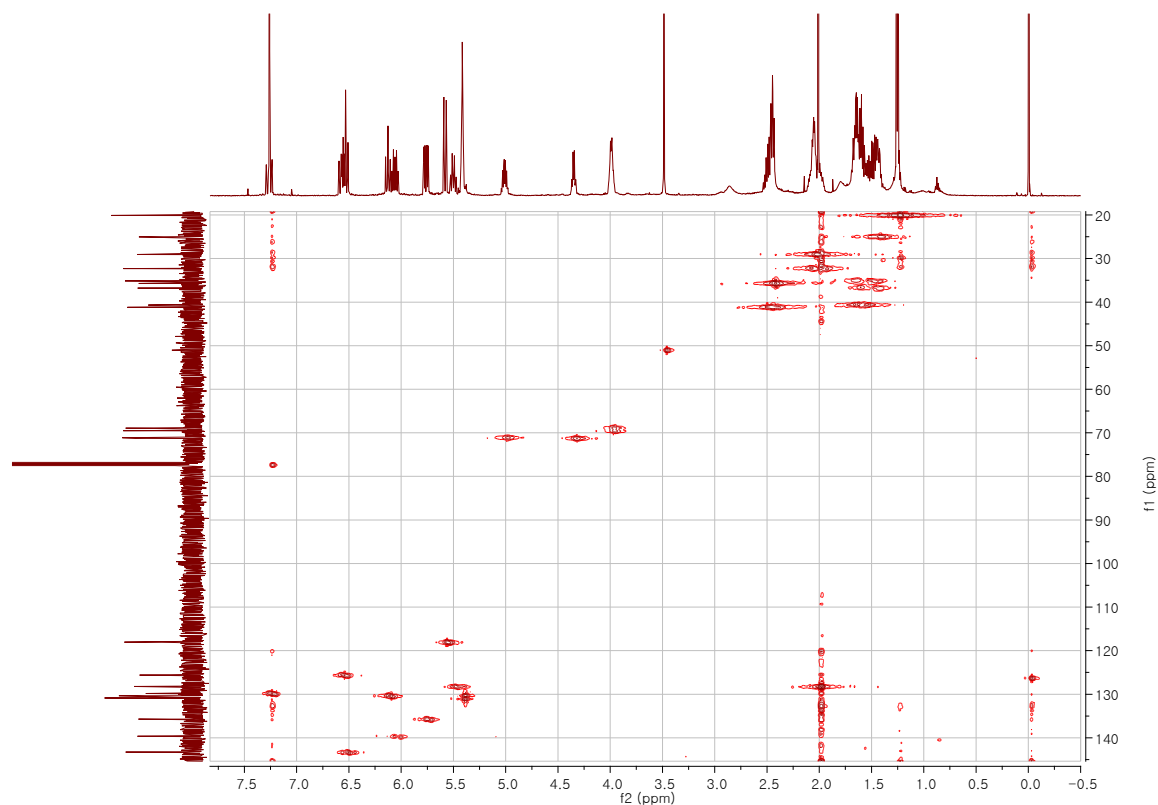

36

37 **Figure S9.** HMQC (500 MHz, CDCl<sub>3</sub>) spectrum of 15-*epi*-dihydromacrolactin F (2)

38

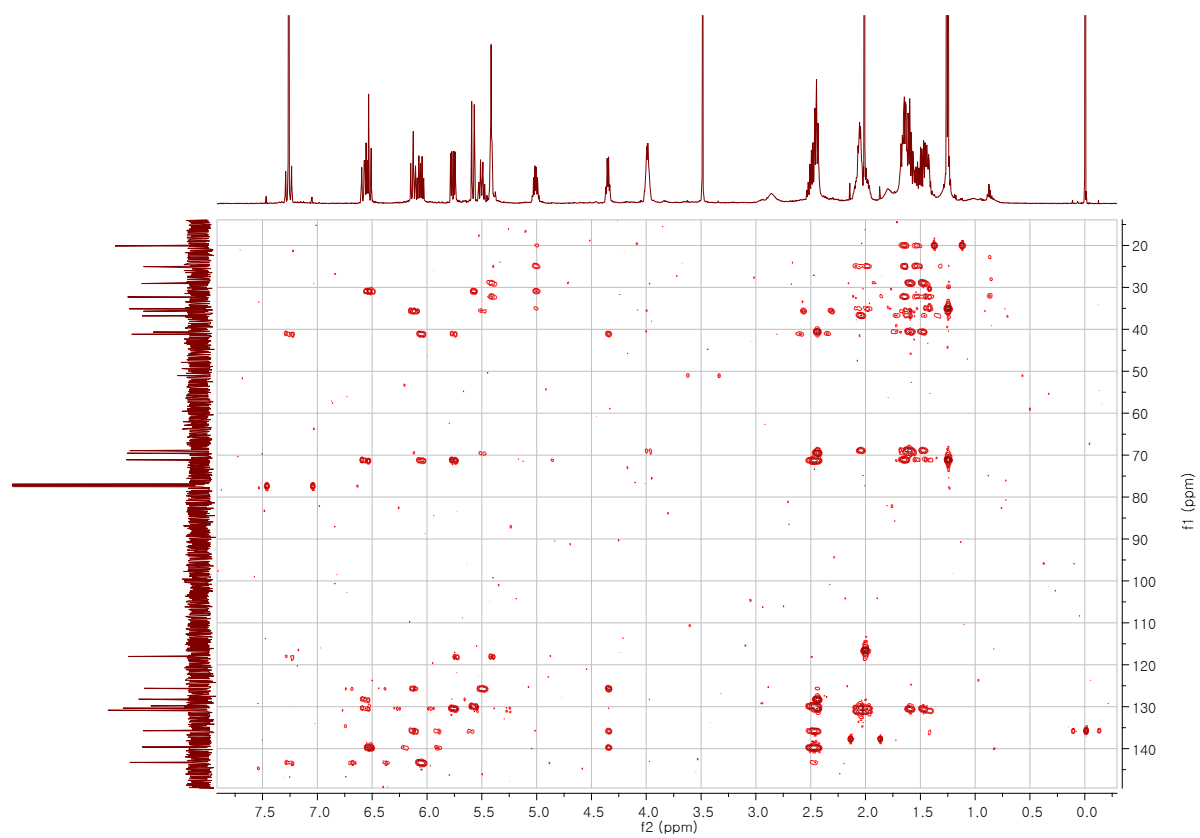

39

40 **Figure S10.** HMBC (500 MHz, CDCl<sub>3</sub>) spectrum of 15-*epi*-dihydromacrolactin F (2)

[ Mass Spectrum ]  
 Data : FAB-M156 Date : 18-Jun-2015 16:04  
 Sample: (S)Irin-mosher ester HC001 E4  
 Note : m-NBA  
 Inlet : Direct Ion Mode : FAB+  
 Spectrum Type : Normal Ion [MF-Linear]  
 RT : 0.70 min Scan# : (3,5)  
 BP : m/z 189.0000 Int. : 1599.98  
 Output m/z range : 10.0000 to 1150.4358 Cut Level : 0.00 %

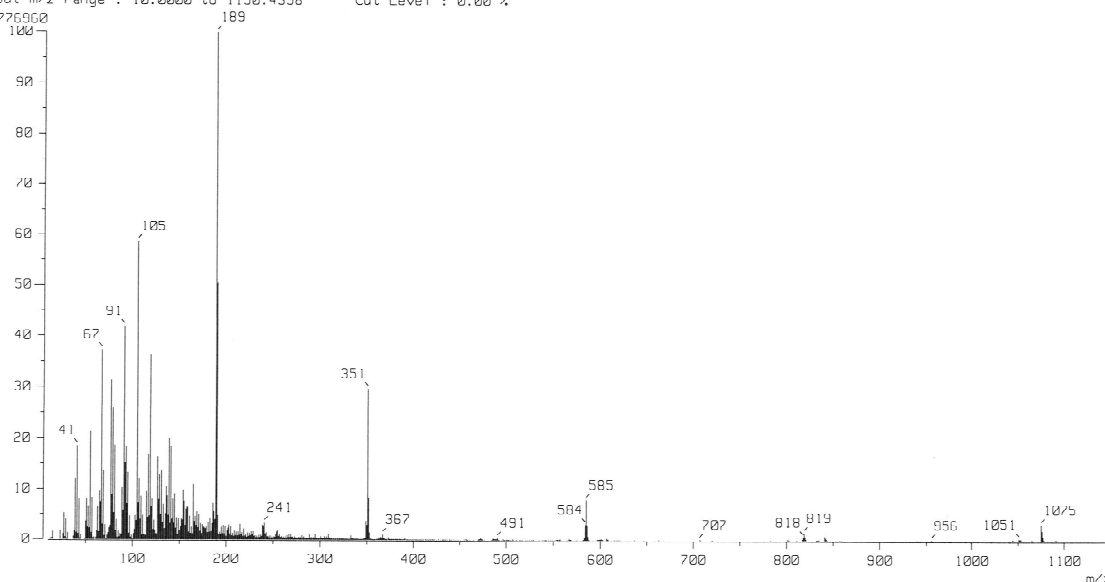

41

[ Elemental Composition ]

Page: 1

Data : FAB-M166 Date : 22-Jun-2015 17:41  
 Sample: HC001 E4  
 Note : m-NBA  
 Inlet : Direct Ion Mode : FAB+  
 RT : 0.90 min Scan# : (16,69)  
 Elements : C 150/0, H 200/0, O 10/0  
 Mass Tolerance : 10ppm, 5mmu if m/z < 500, 10mmu if m/z > 1000  
 Unsaturation (U.S.) : -0.5 - 100.0

| Observed m/z | Int% | Err [ppm / mmu] | U.S. Composition  |
|--------------|------|-----------------|-------------------|
| 405.2642     | 4.6  | +0.3 / +0.1     | 6.5 C 24 H 37 O 5 |

42

[ Theoretical Ion Distribution ]

Page: 1

Molecular Formula : C<sub>24</sub>H<sub>37</sub>O<sub>5</sub>  
 (m/z 405.2641, MW 405.5548, U.S. 6.5)  
 Base Peak : 405.2641, Averaged MW : 405.5509(a), 405.5517(w)

| m/z      | INT.           |
|----------|----------------|
| 405.2641 | 100.0000 ***** |
| 406.2675 | 26.8841 *****  |
| 407.2703 | 4.4677 ***     |
| 408.2730 | 0.5541         |
| 409.2756 | 0.0554         |
| 410.2783 | 0.0047         |
| 411.2809 | 0.0003         |

43

44 **Figure S11.** HR-FAB-MS of 15-*epi*-dihydromacrolactin F (2)

45

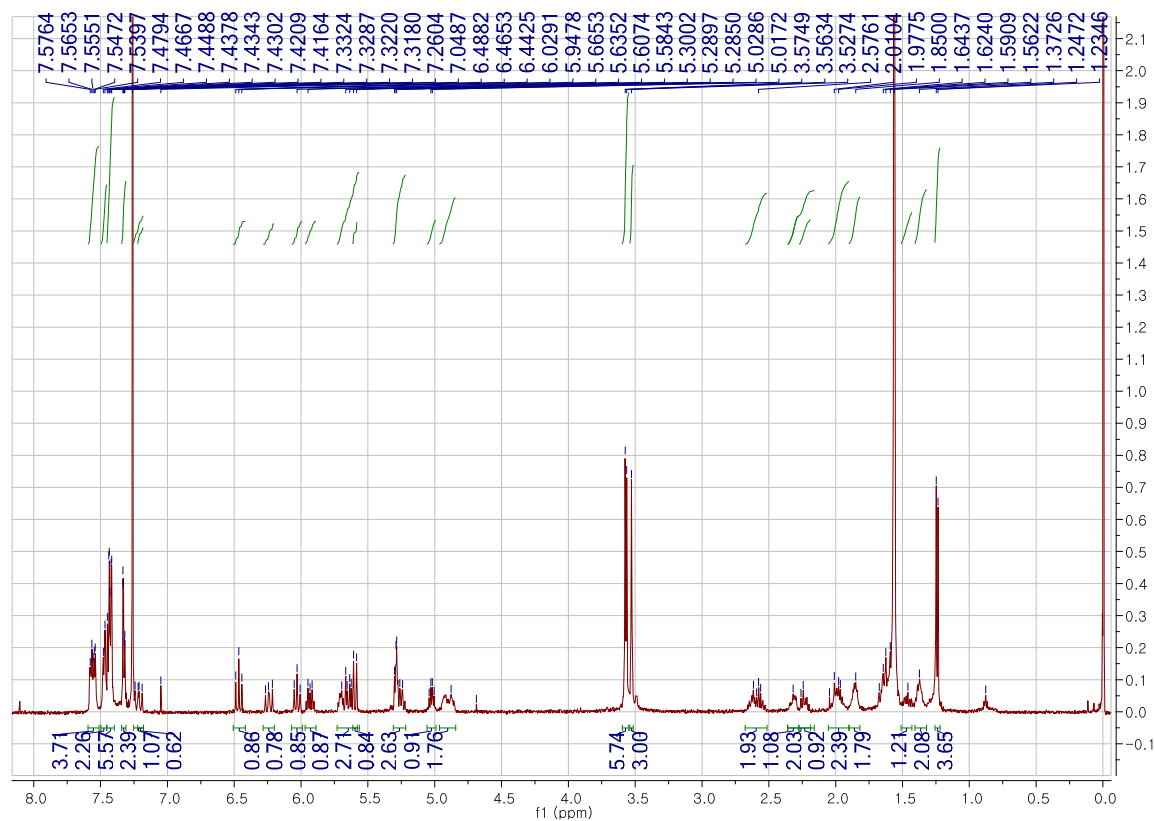

46

47 **Figure S12.**  $^1\text{H}$  NMR (500 MHz,  $\text{CDCl}_3$ ) spectrum of *tris*-(S)-MTPA ester of 2 (2a)

48

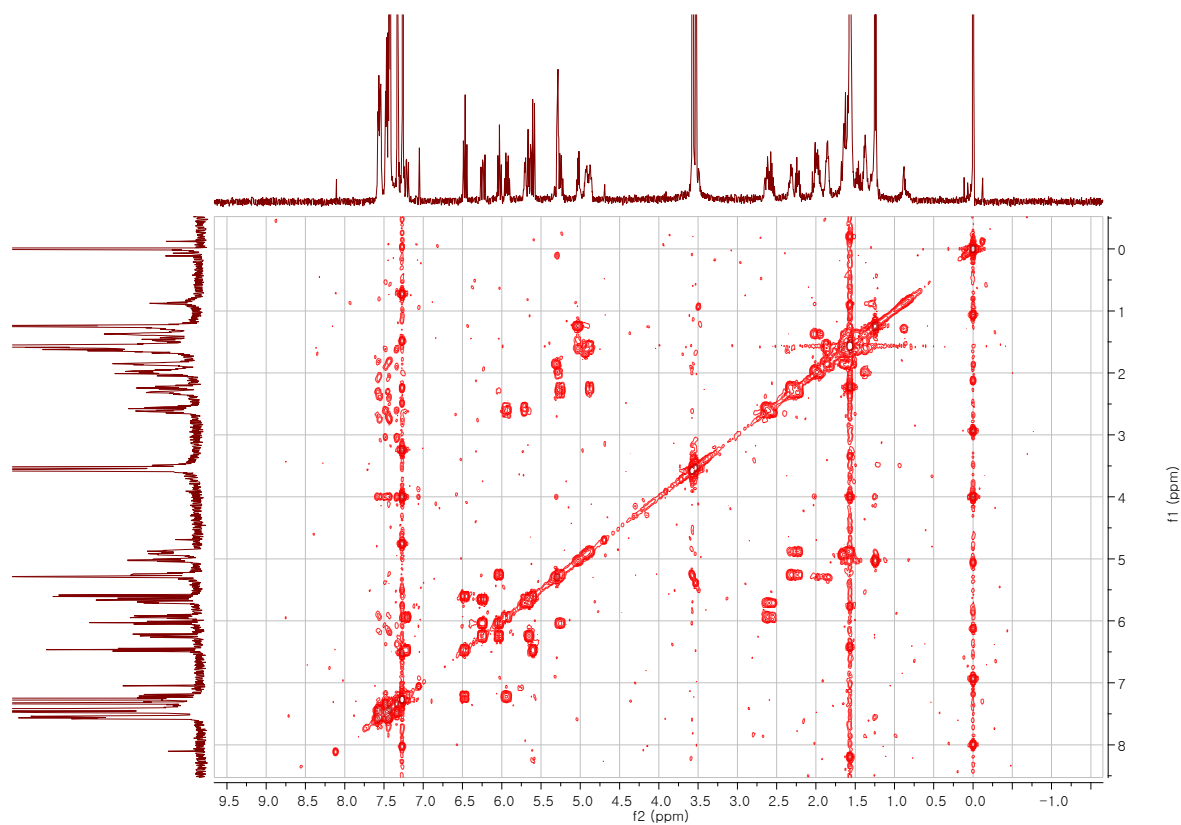

49

50 **Figure S13.**  $^1\text{H}$ - $^1\text{H}$  COSY (500 MHz,  $\text{CDCl}_3$ ) spectrum of *tris*-(S)-MTPA ester of 2 (2a)

51



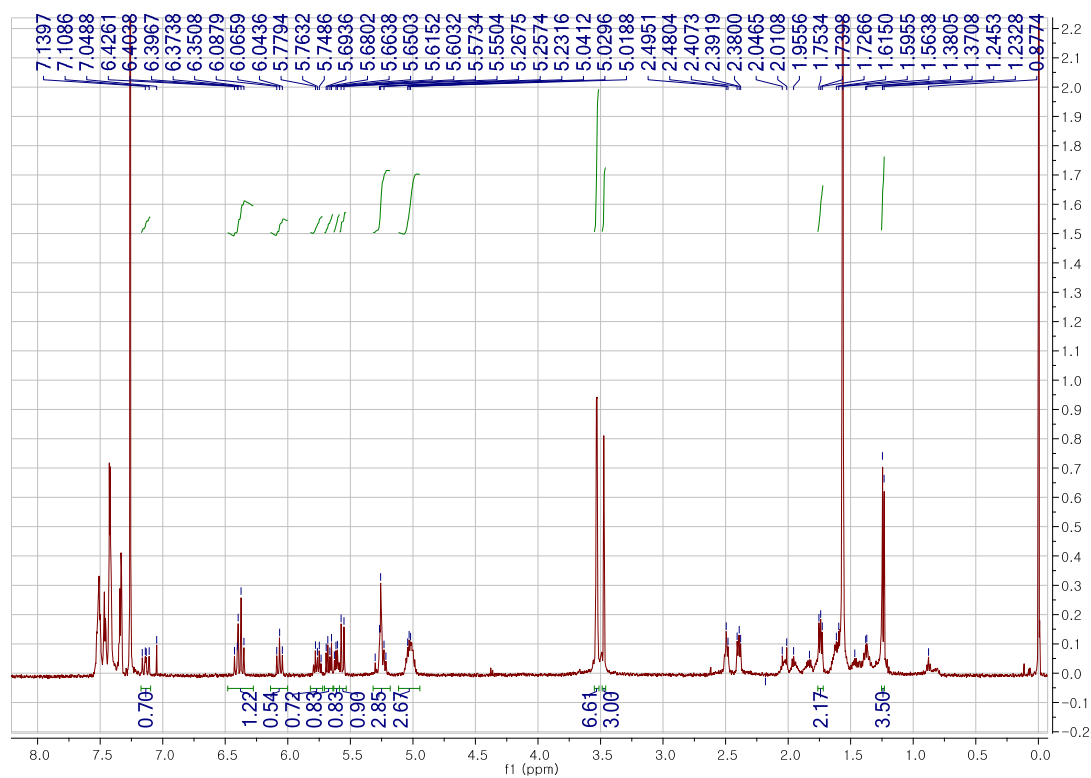

52

53 **Figure S14.**  $^1\text{H}$  NMR (500 MHz,  $\text{CDCl}_3$ ) spectrum of *tris*-(*R*)-MTPA ester of **2** (**2b**)

54

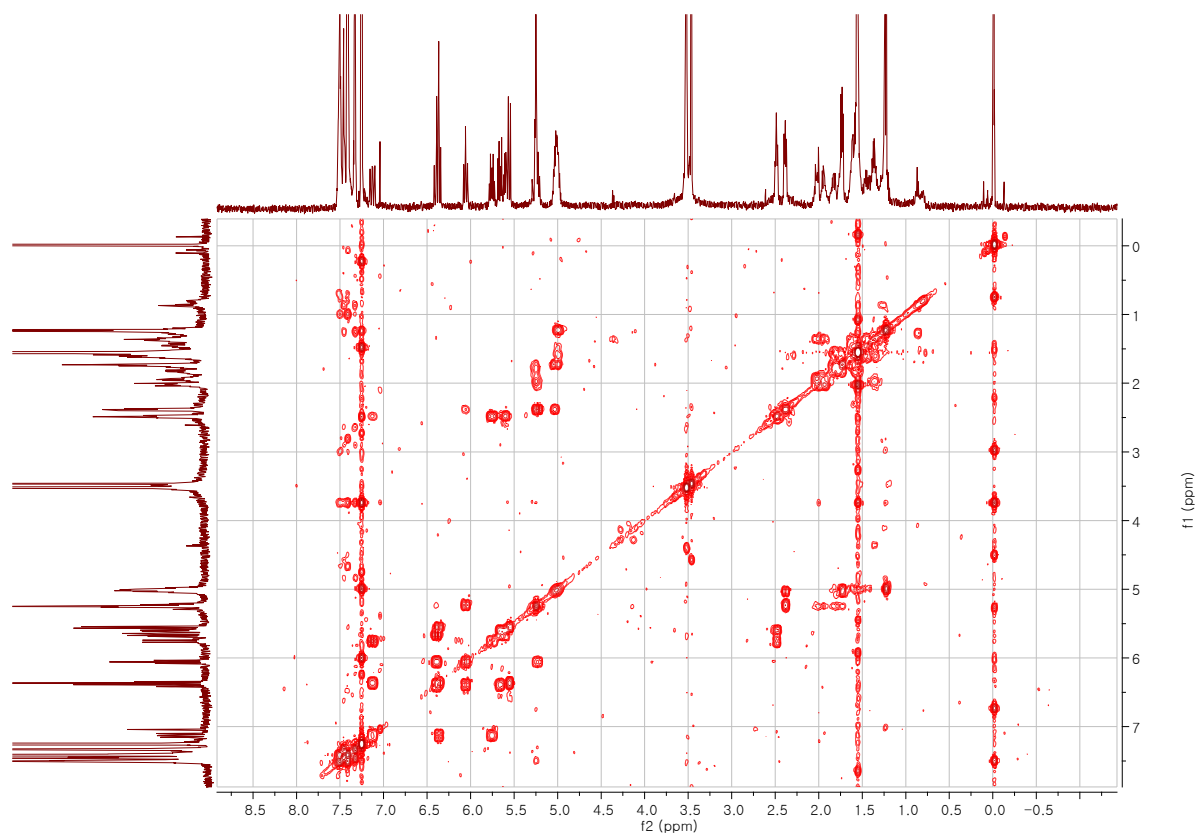

55

56 **Figure S15.**  $^1\text{H}$ - $^1\text{H}$  COSY (500 MHz,  $\text{CDCl}_3$ ) spectrum of *tris*-(*R*)-MTPA ester of **2** (**2b**)

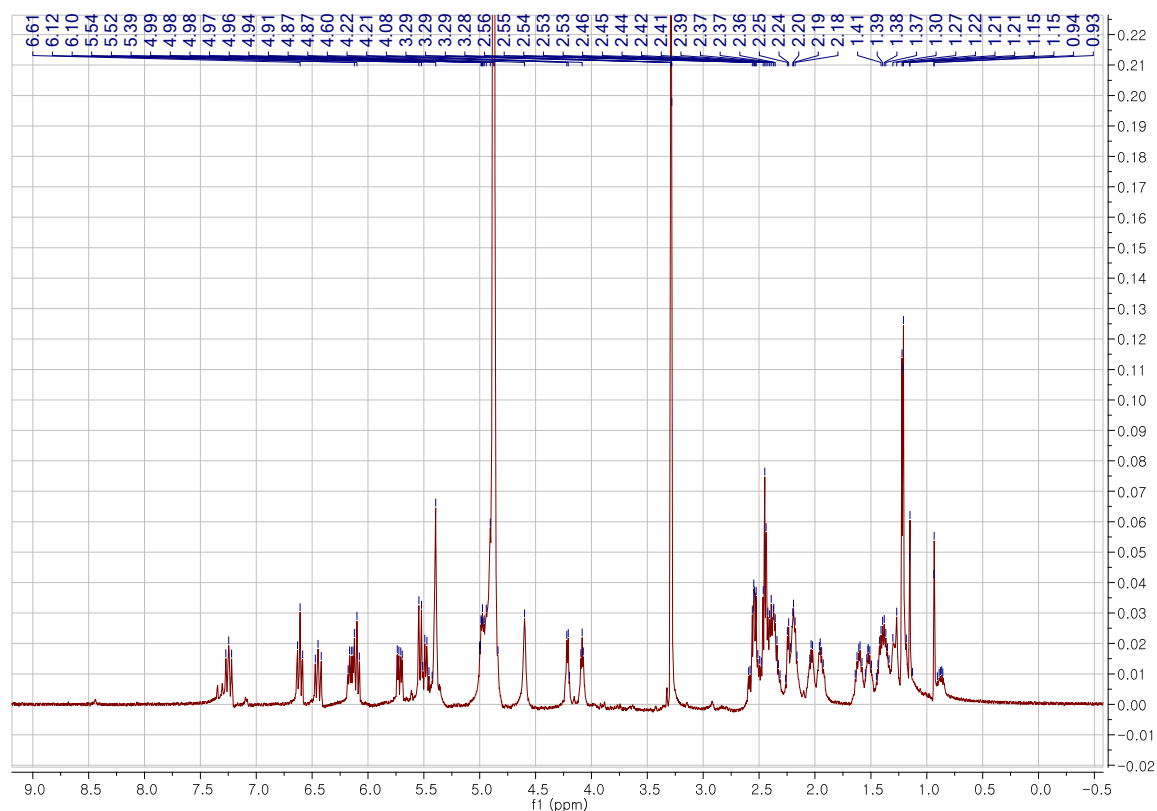

57

58 **Figure S16.** <sup>1</sup>H NMR (500 MHz, CD<sub>3</sub>OD) spectrum of macrolactin F (3)

59

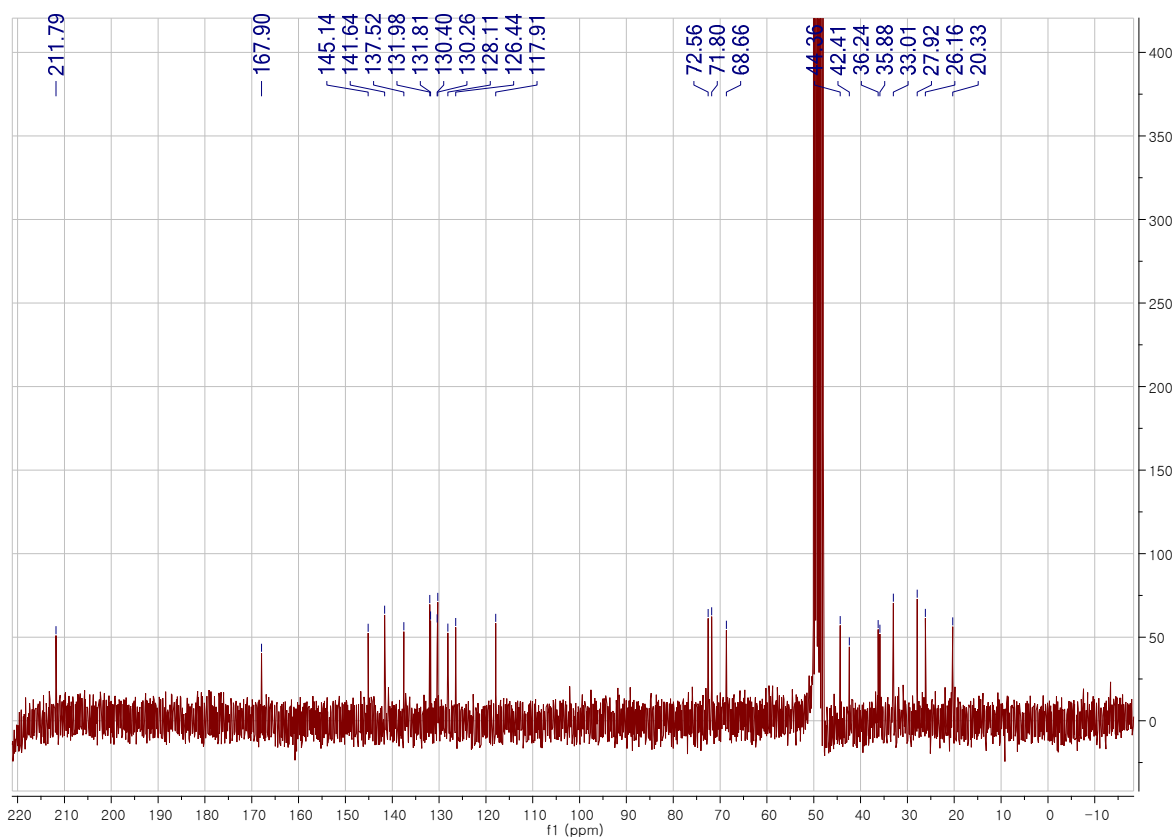

60

61 **Figure S17.** <sup>13</sup>C NMR (125 MHz, CD<sub>3</sub>OD) spectrum of macrolactin F (3)

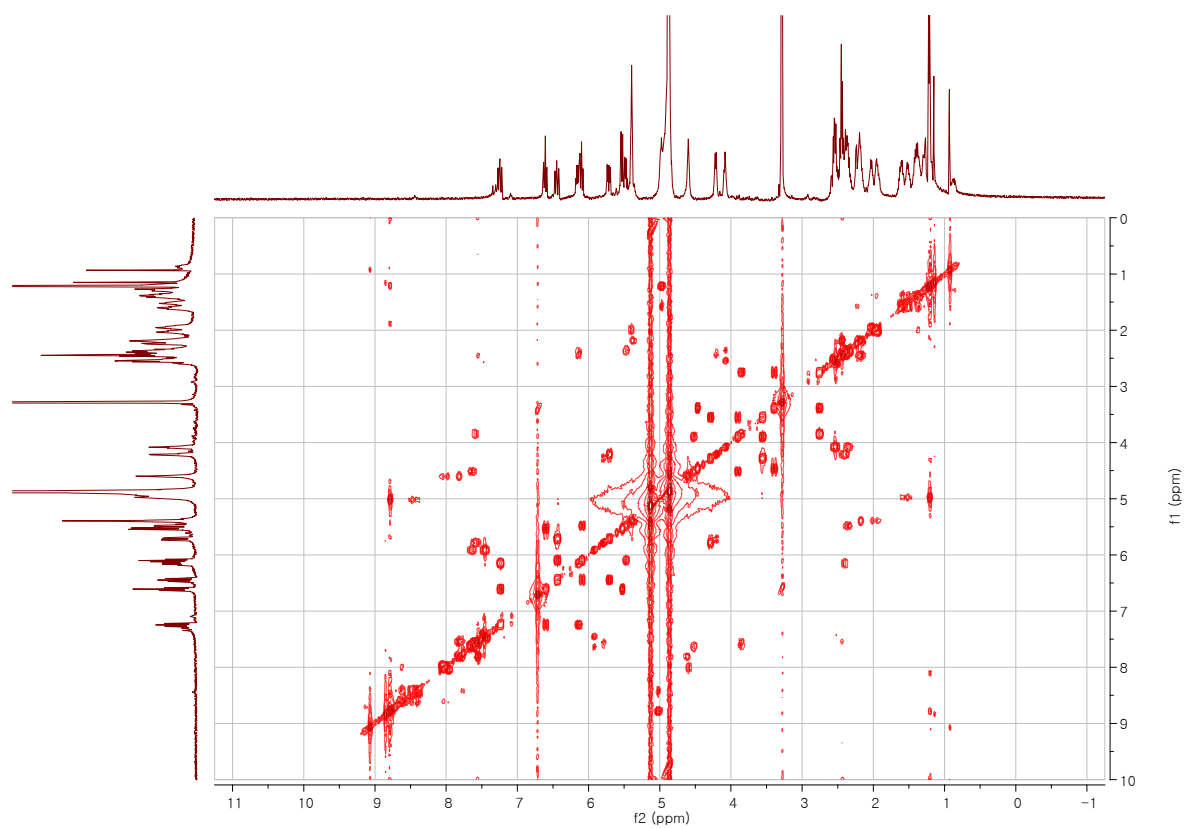

62

63 **Figure S18.**  $^1\text{H}$ - $^1\text{H}$  COSY (500 MHz,  $\text{CD}_3\text{OD}$ ) spectrum of macrolactin F (3)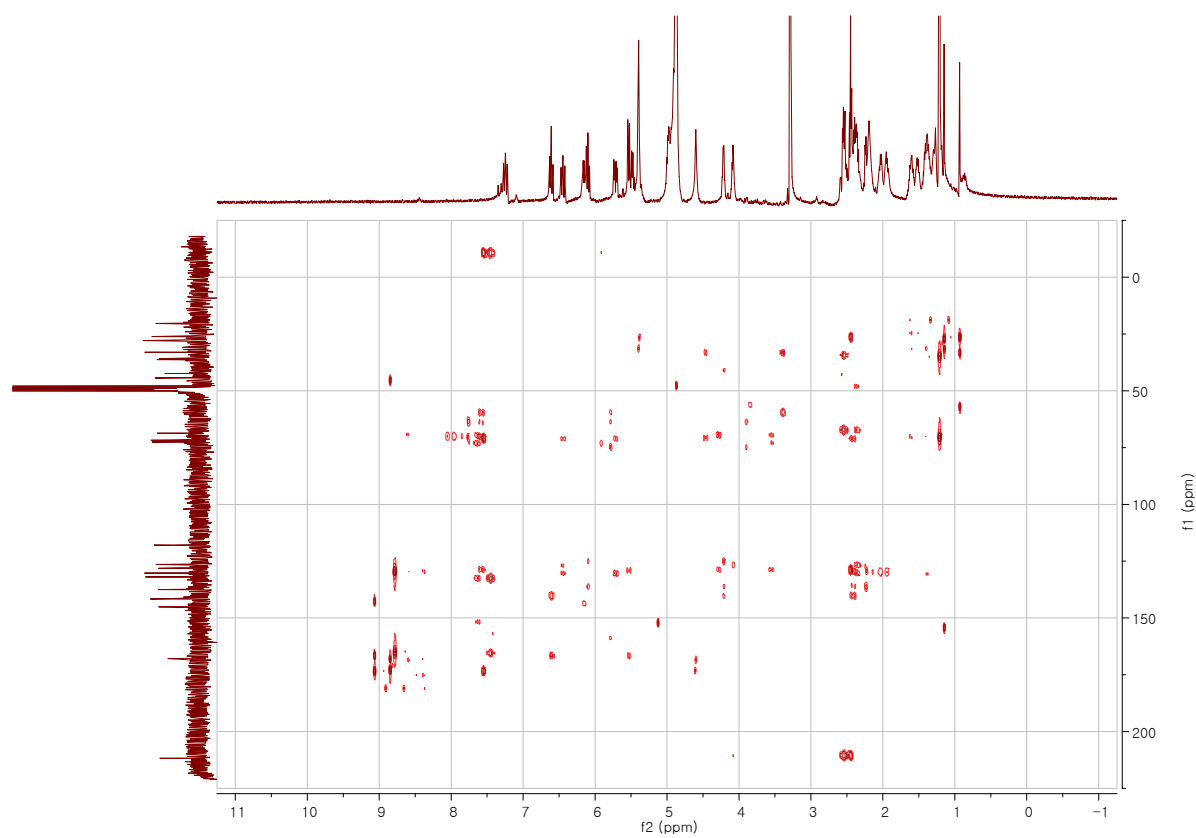

64

65 **Figure S19.** HMQC (500 MHz,  $\text{CD}_3\text{OD}$ ) spectrum of macrolactin F (3)

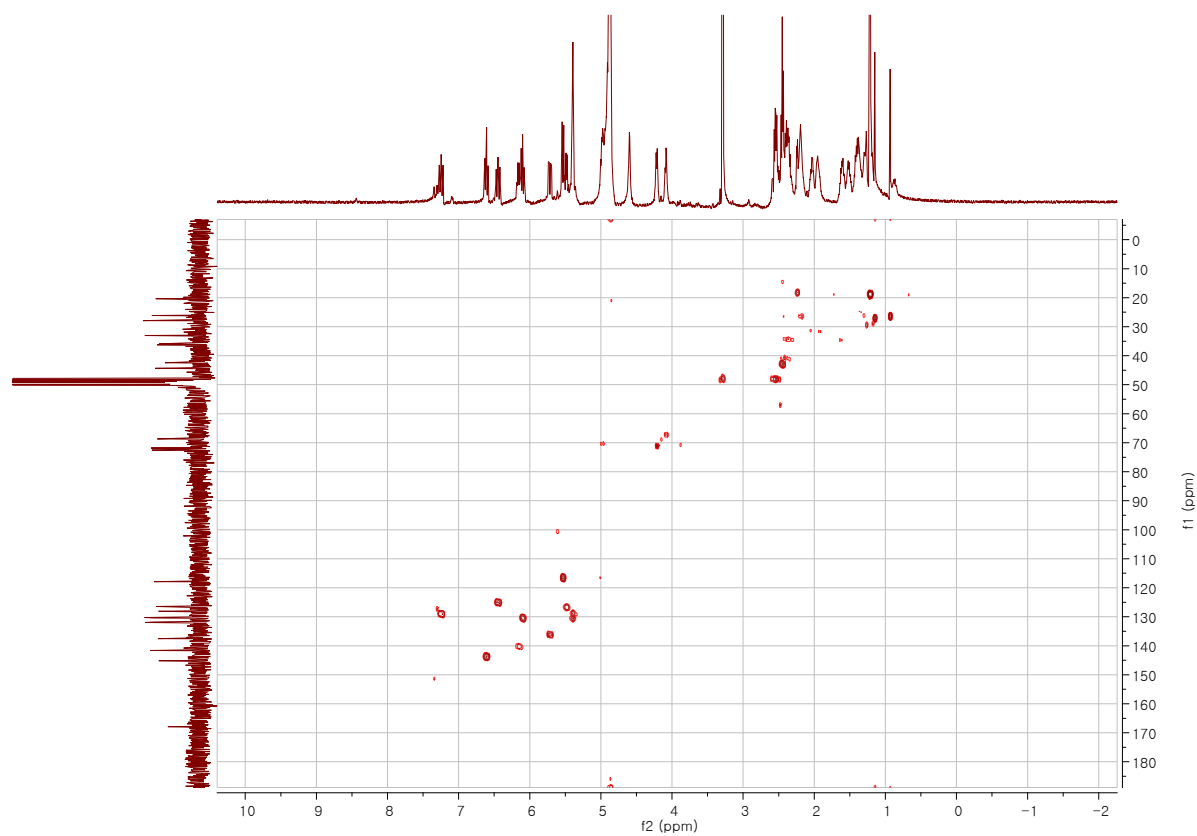

66

67

68 **Figure S20.** HMBC (500 MHz, CD<sub>3</sub>OD) spectrum of macrolactin F (**3**)

69
